# Supplementary material
Source: PubMed Central journal article supplement (PMC3434970)

# Peptidomic Analyses of Mouse Astrocytic Cell Lines and Rat Primary Cultured Astrocytes

Ping Yin<sup>1,4</sup>, Ann M. Knolhoff<sup>1,4</sup>, Harry J. Rosenberg<sup>3</sup>, Larry J. Millet<sup>2</sup>, Martha U. Gillette<sup>2-4</sup>,  
Jonathan V. Sweedler<sup>1,3,4\*</sup>

## **Supporting Information**

The MS/MS spectra for peptide identifications with the annotations on masses, *b* and *y* ions, and amino acid assignments by BioTools 3.1. The entire peptide sequence is shown under the corresponding MS/MS spectrum. The mass tolerances were set to 0.55 Da for the ESI-IT MS/MS data and 0.05 Da for the ESI-Qq-TOF MS/MS data. Each peptide has either an ion score higher than 30 in the Mascot search or more than three consecutive amino acids assigned within the mass tolerances.

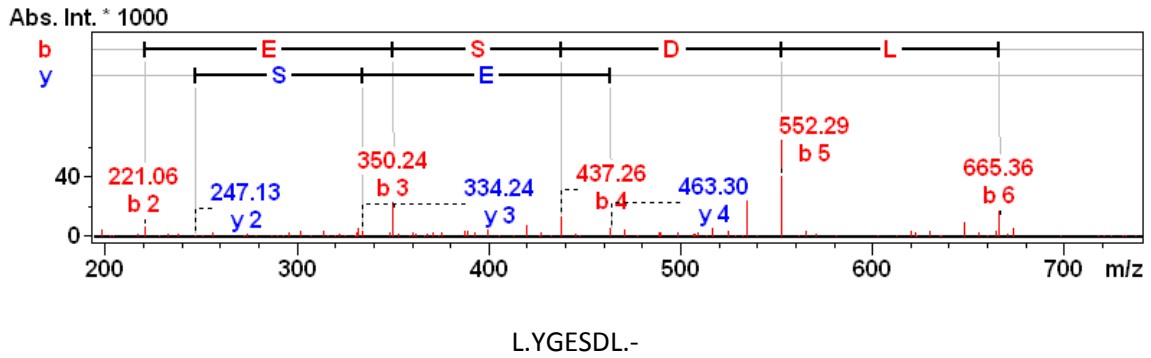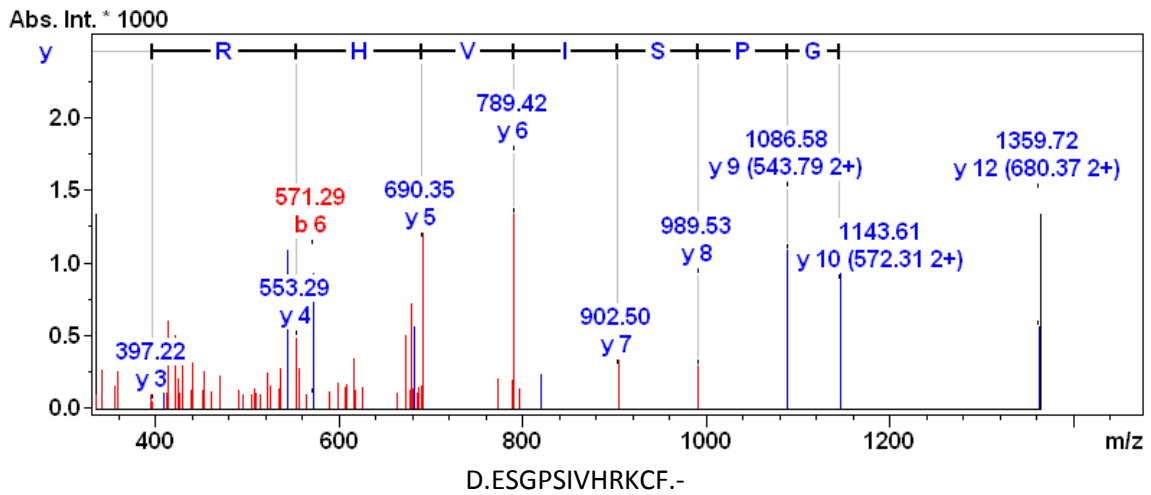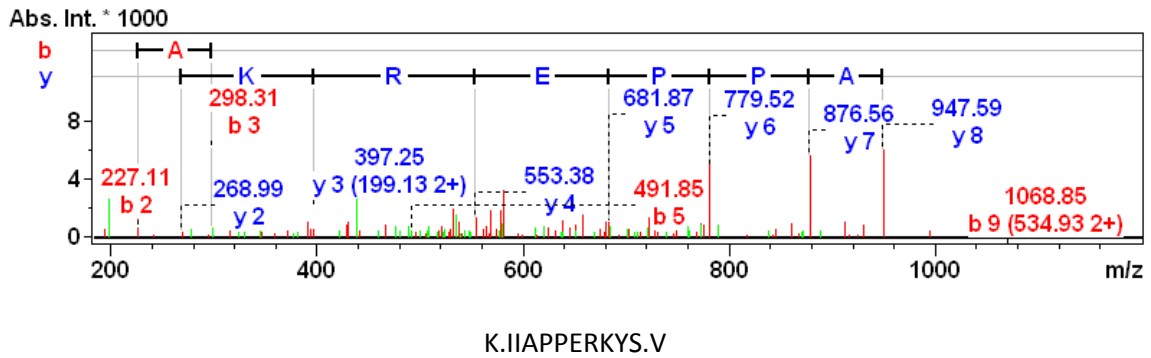

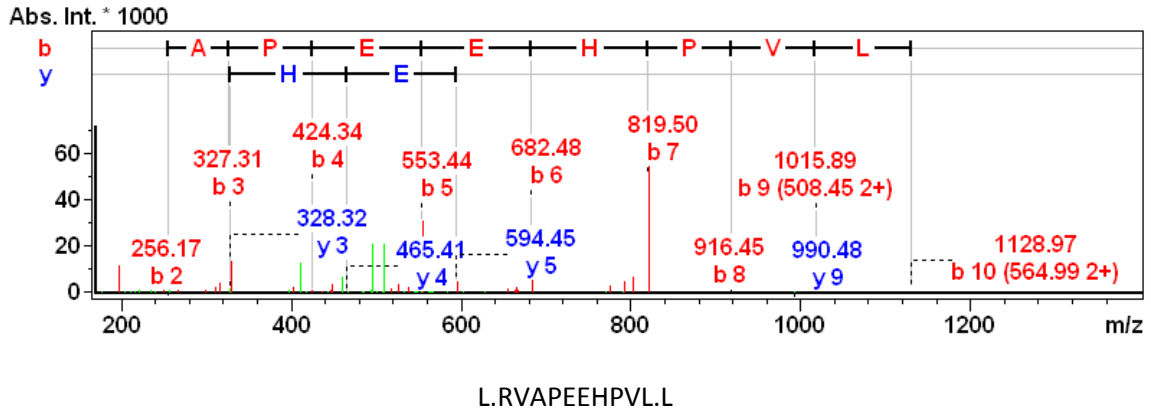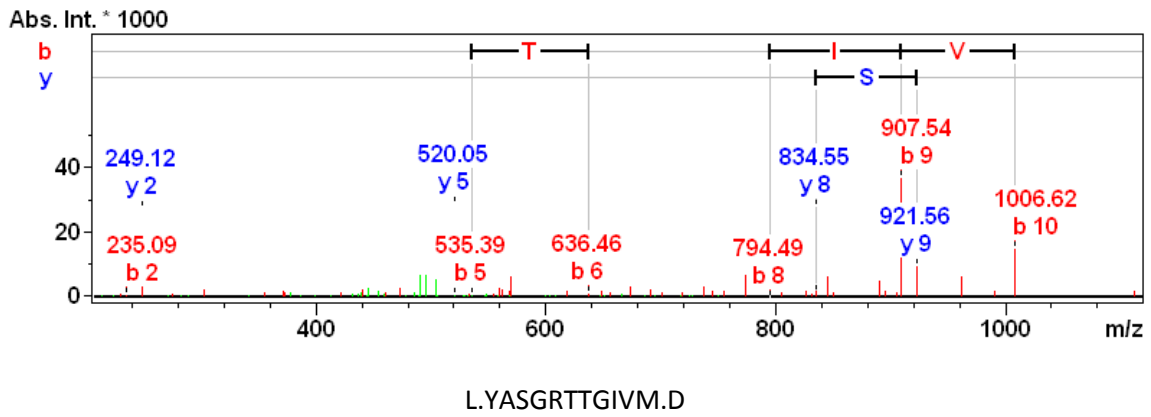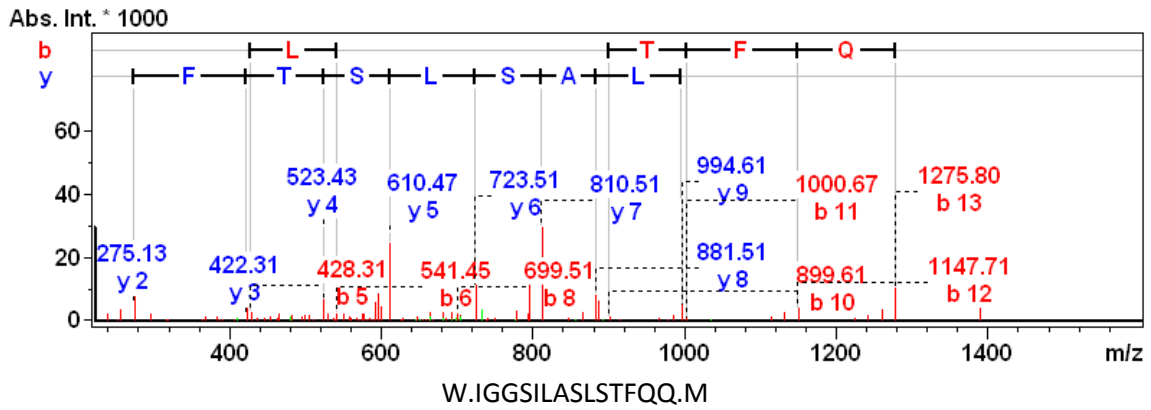

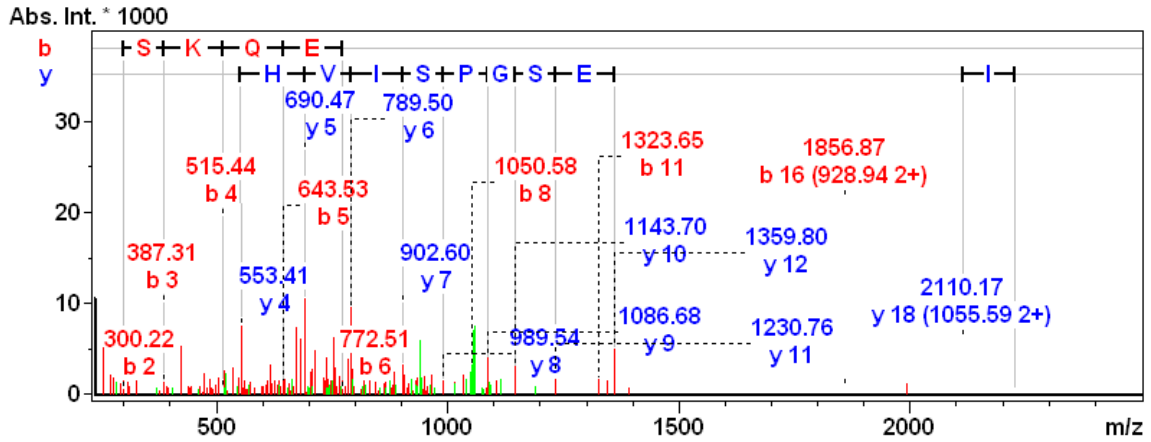

M.WISKQEYDESGPSIVHRKCF.-

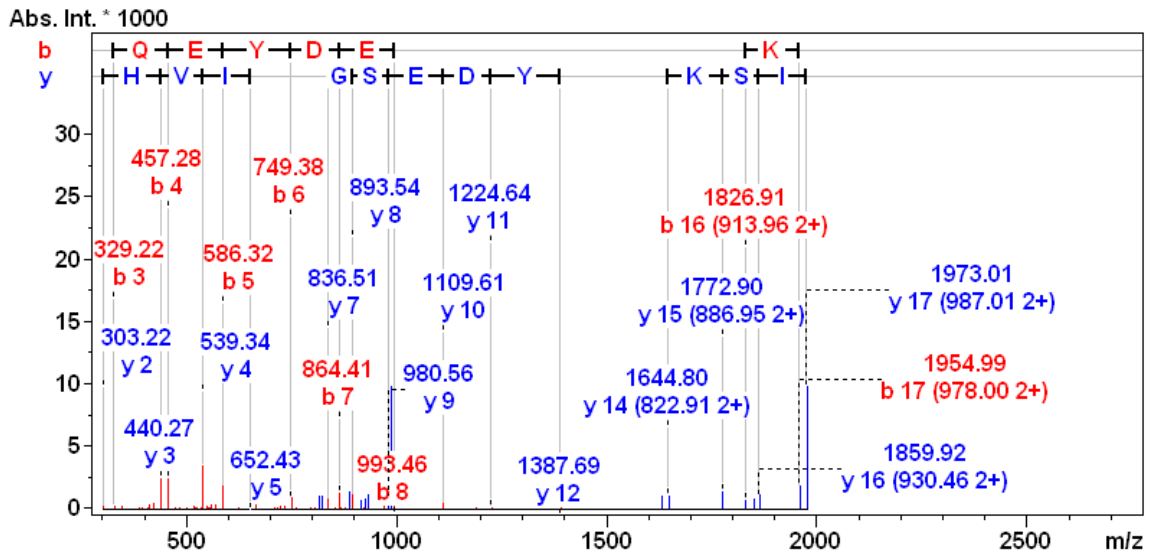

W.ISKQEYDESGPSIVHRK.C

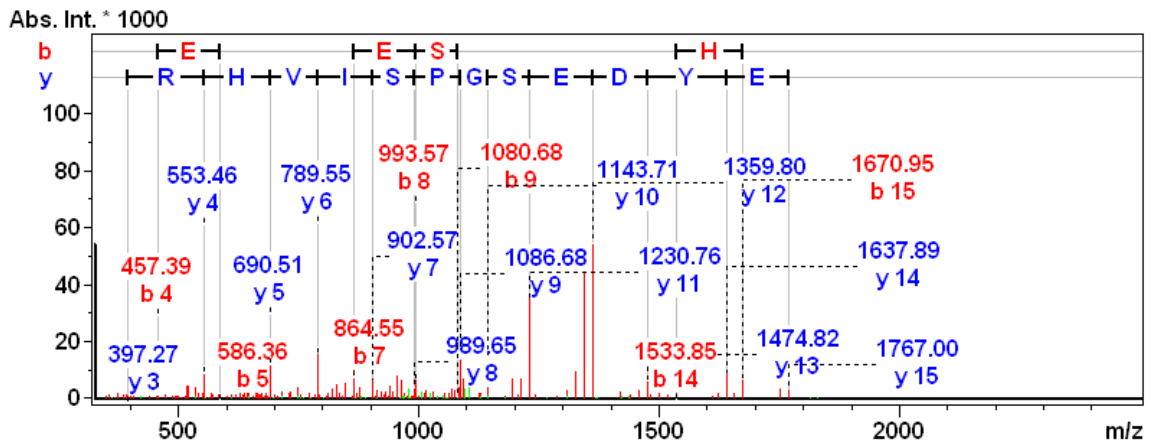

W.ISKQEYDESGPSIVHRKCF.-

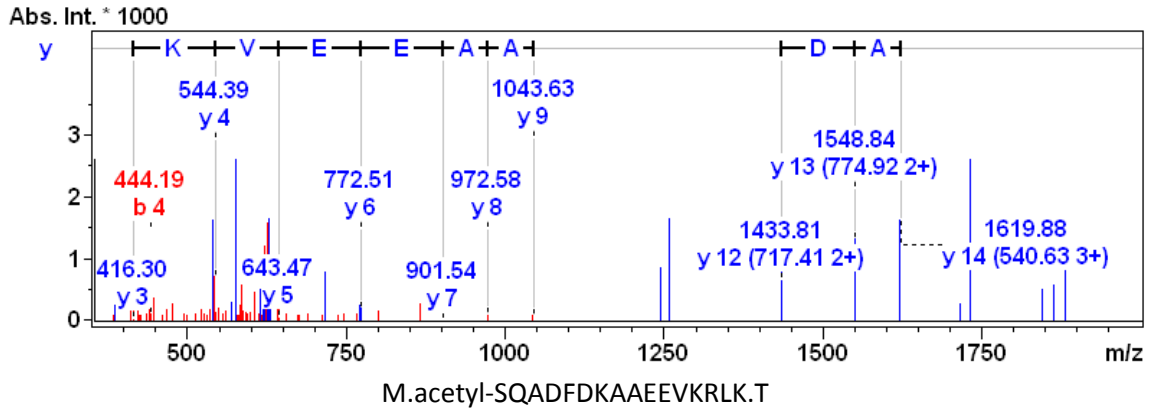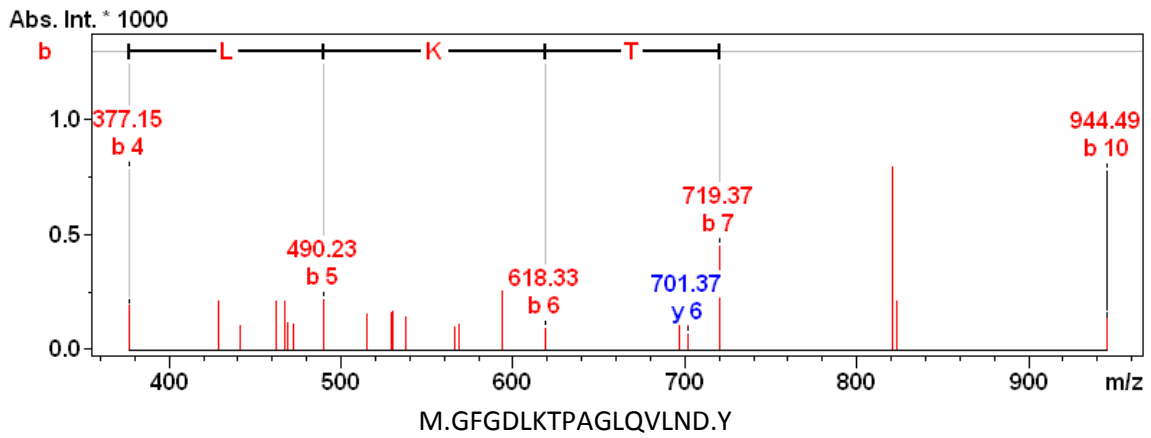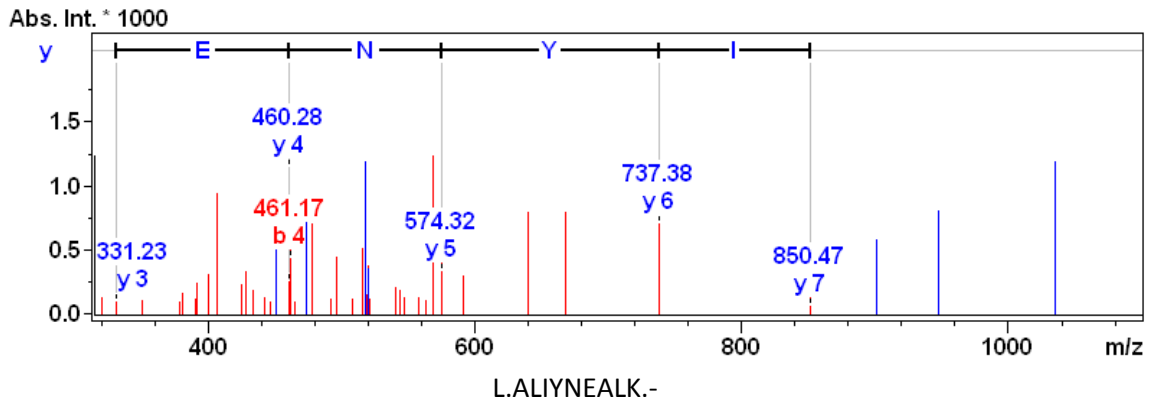

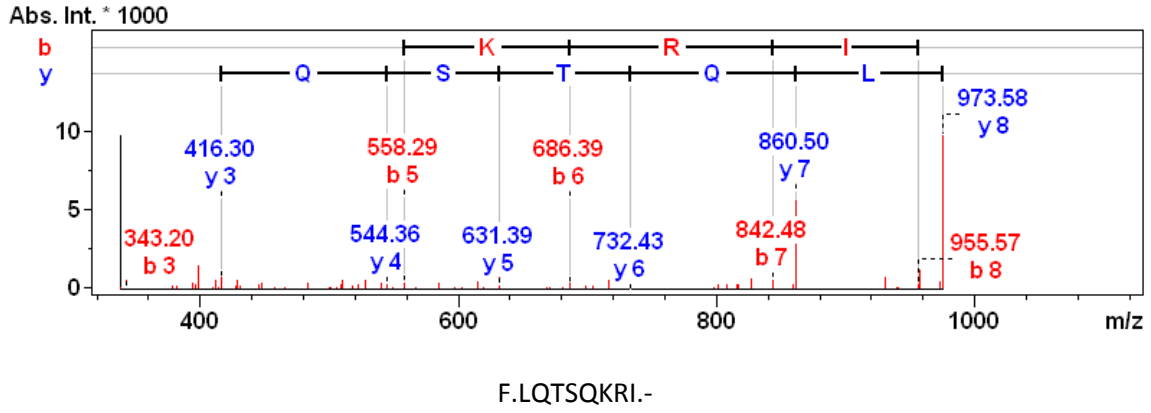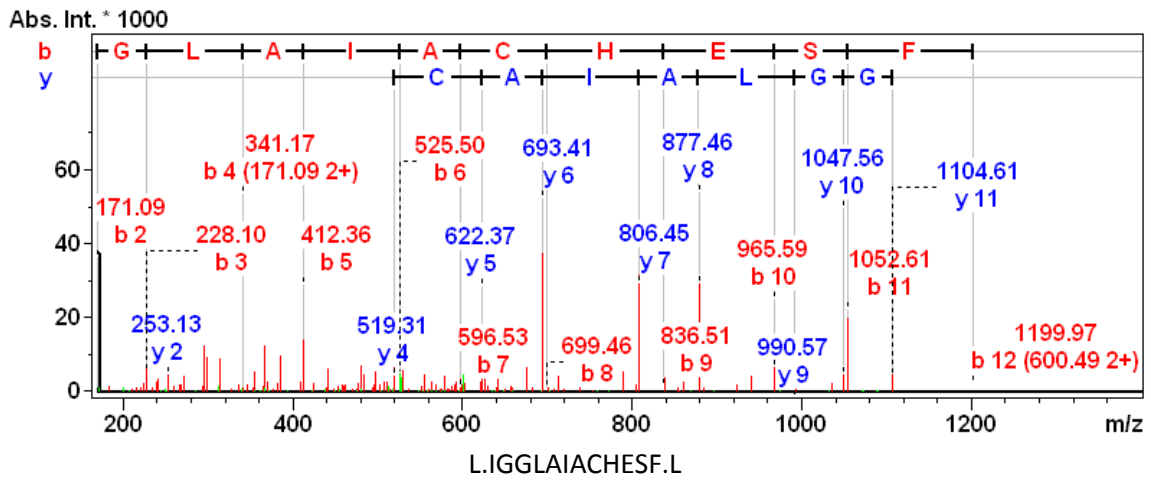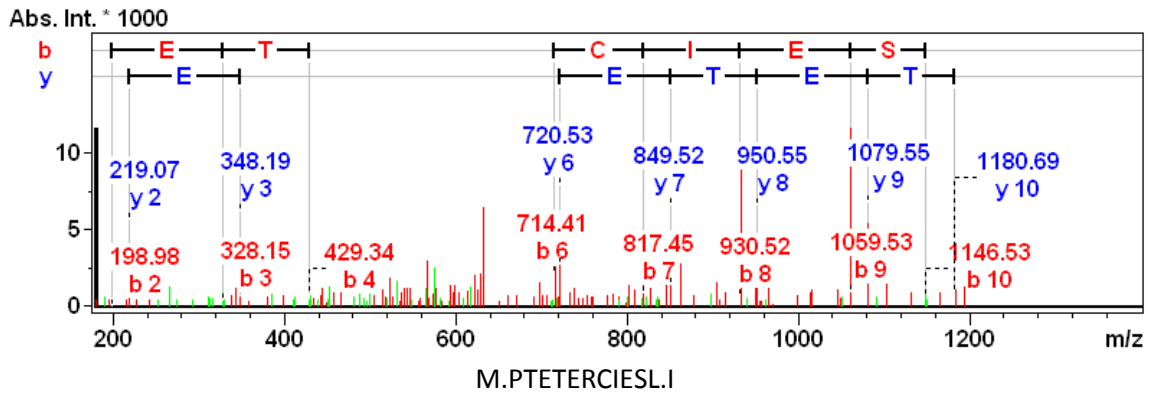

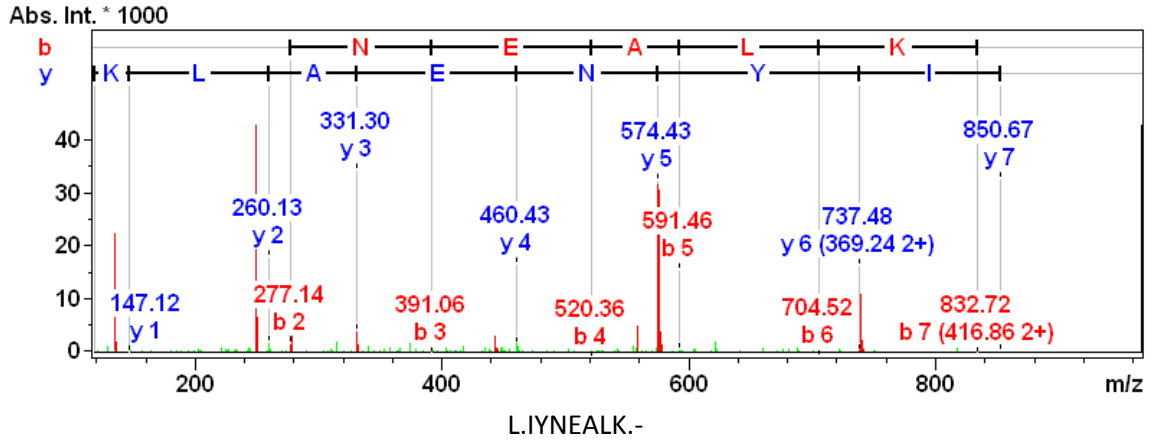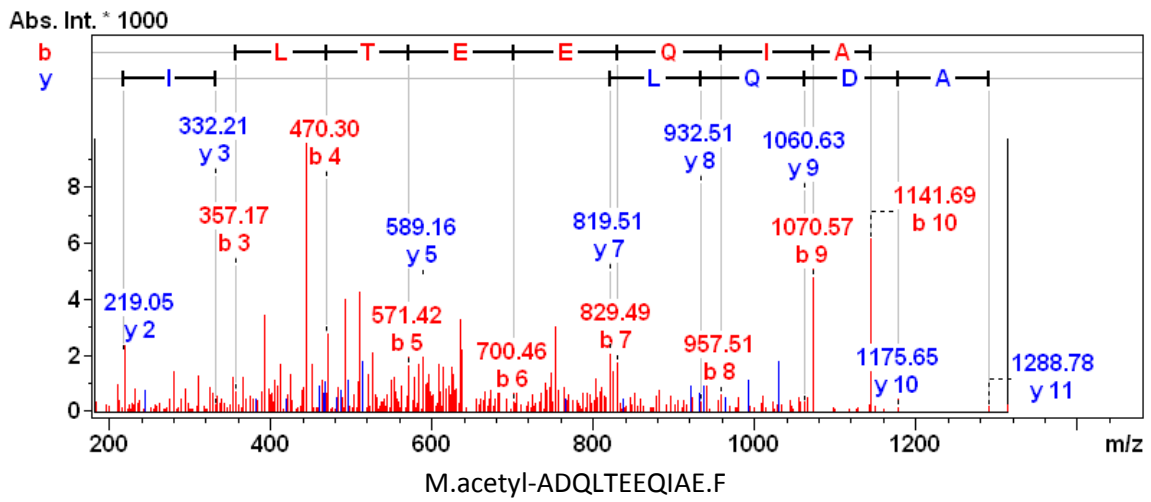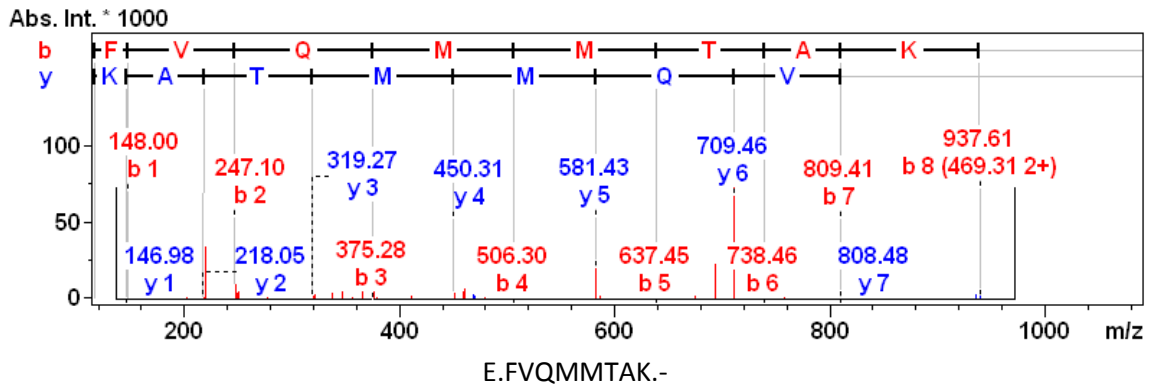

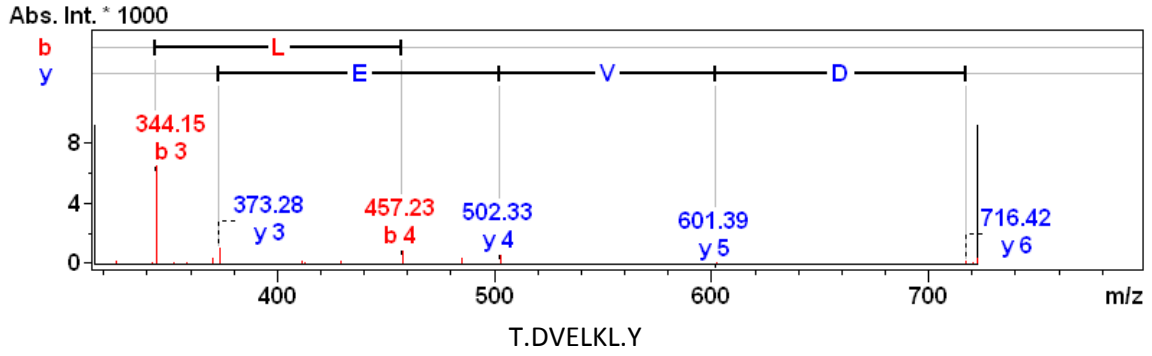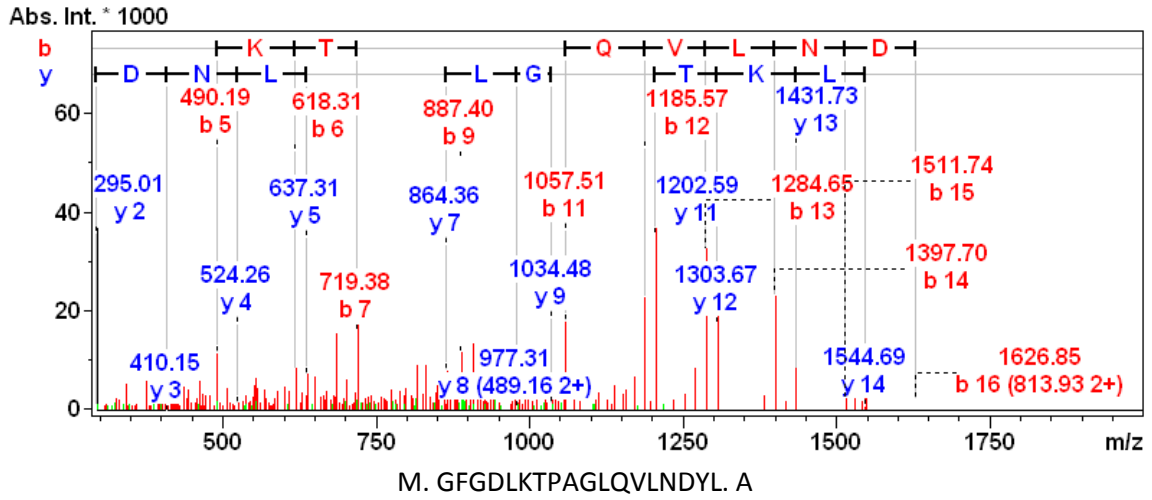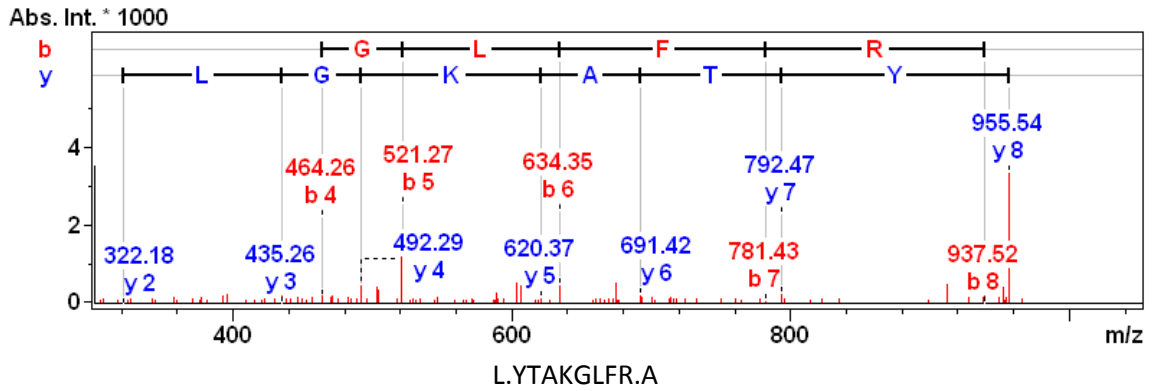



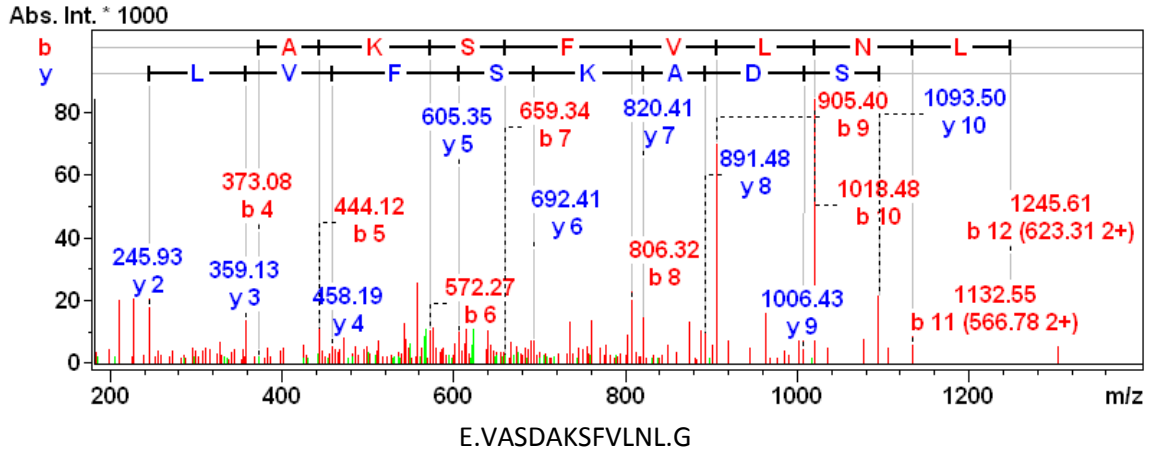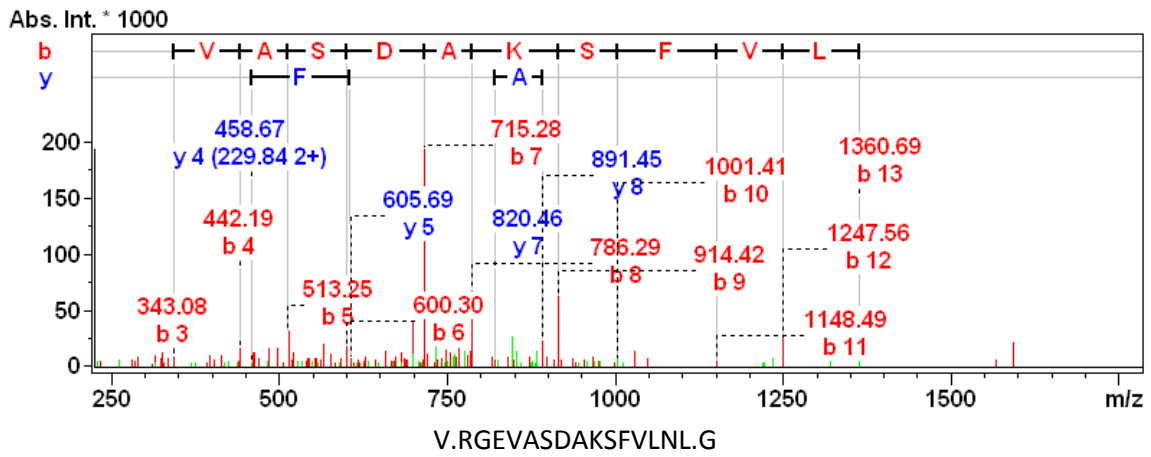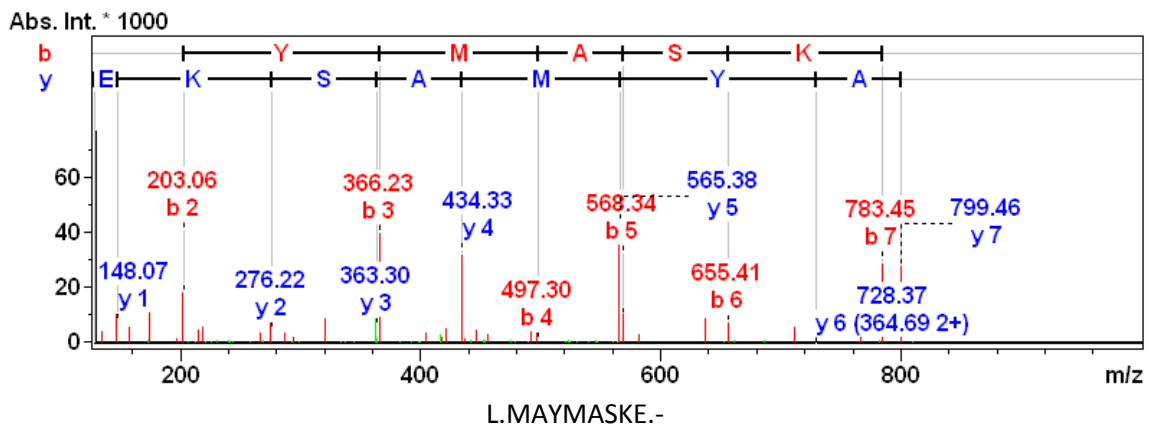

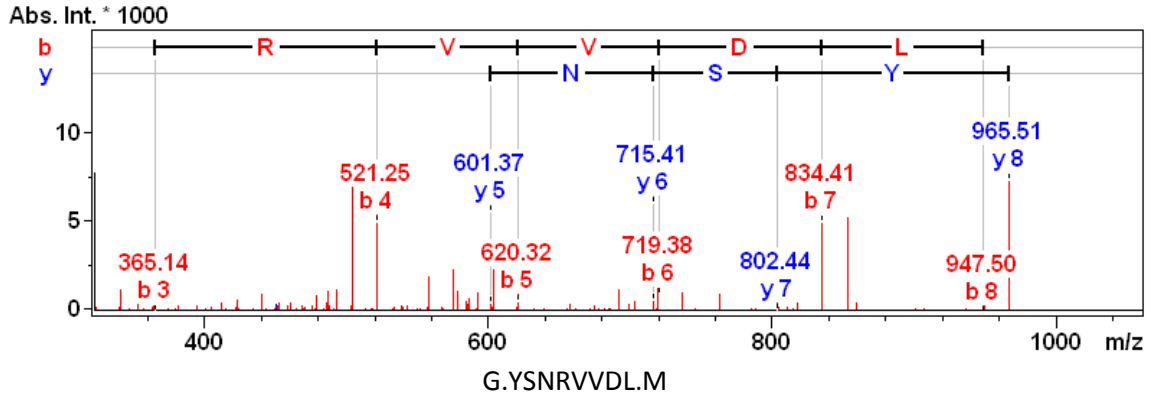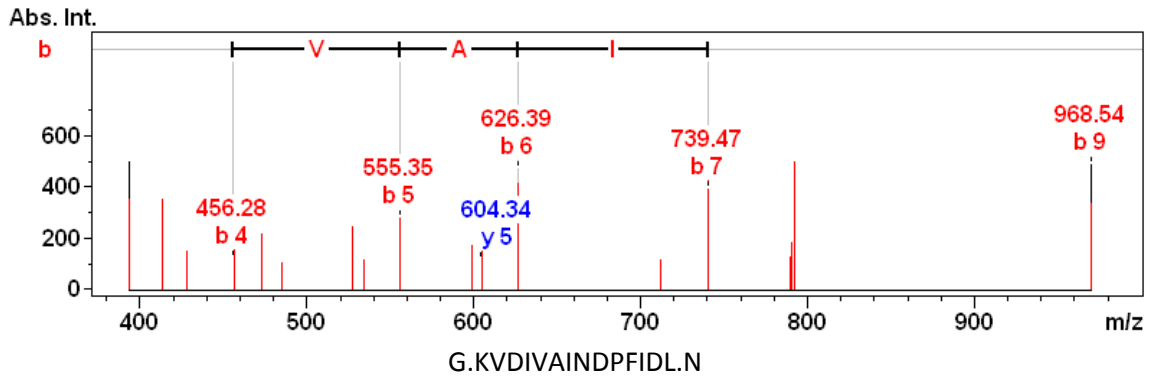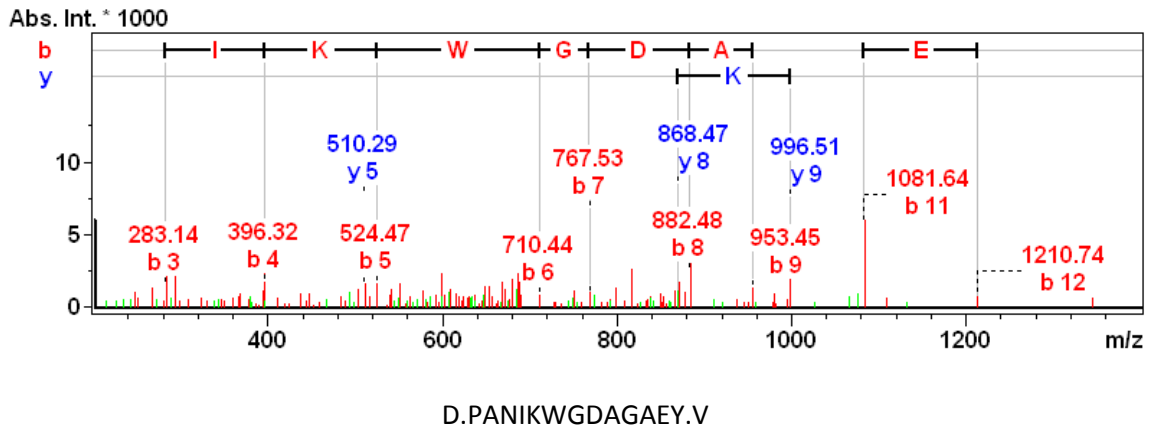

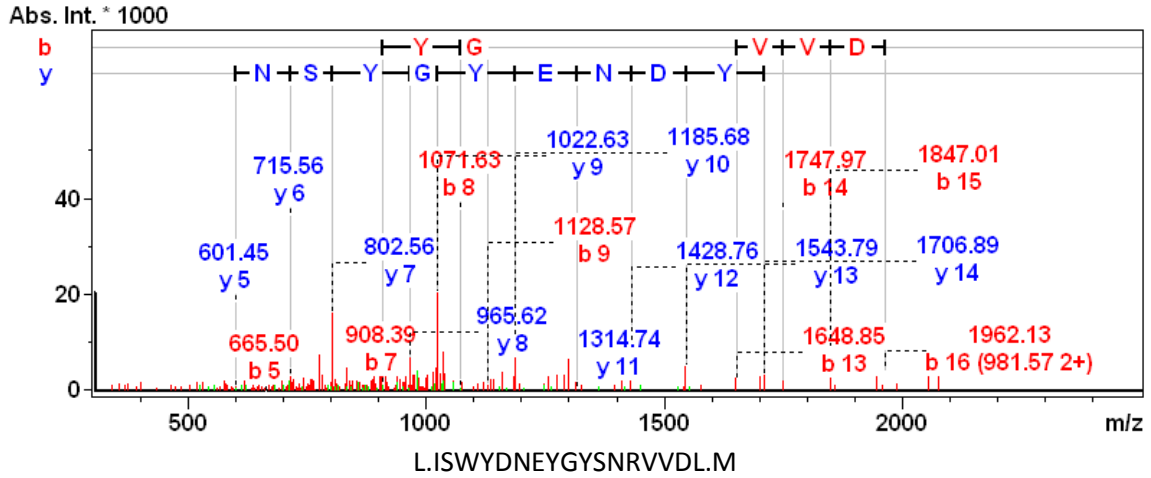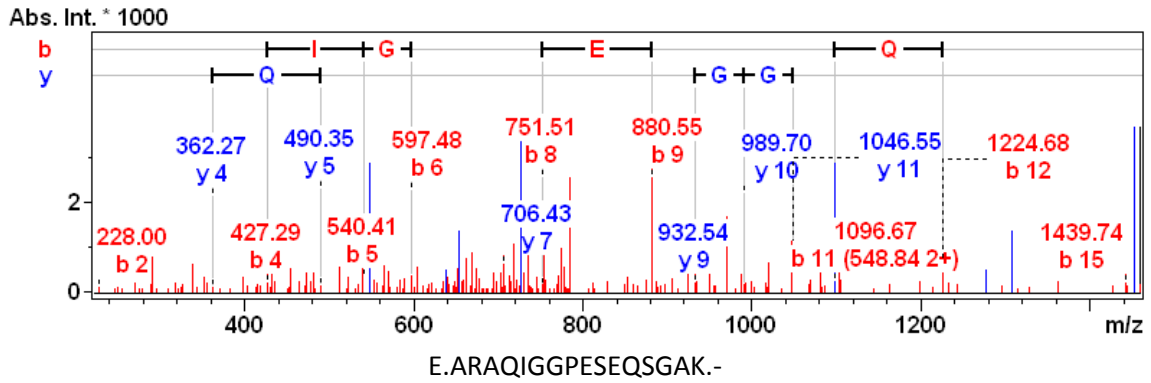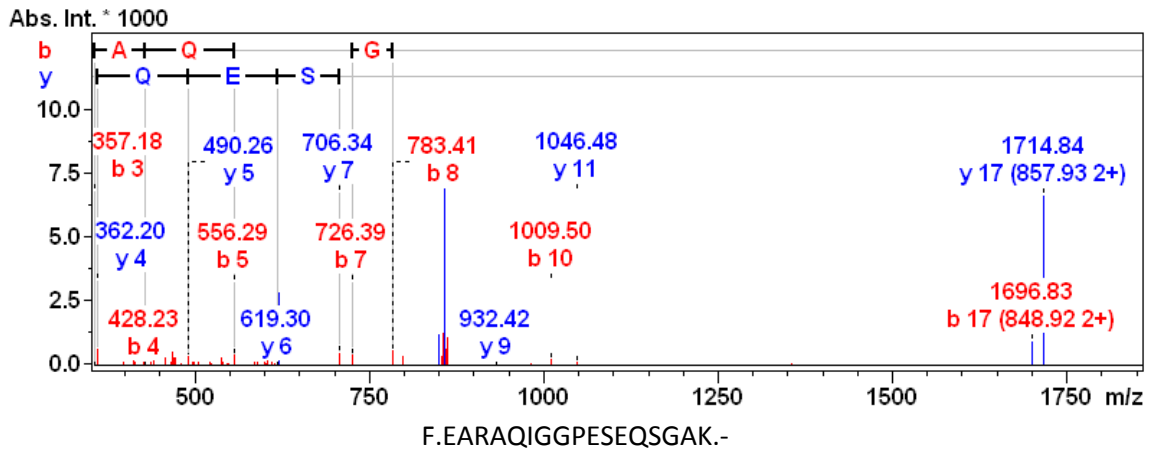

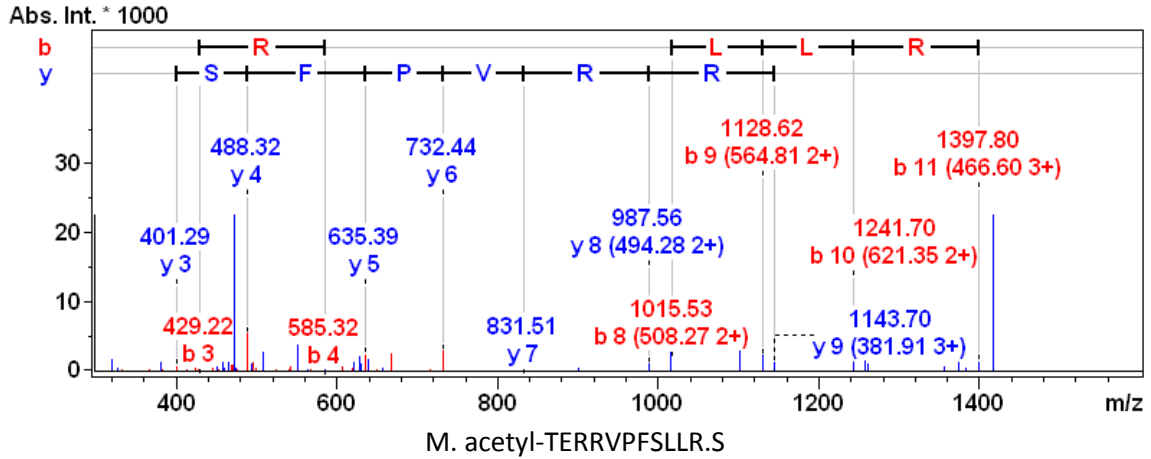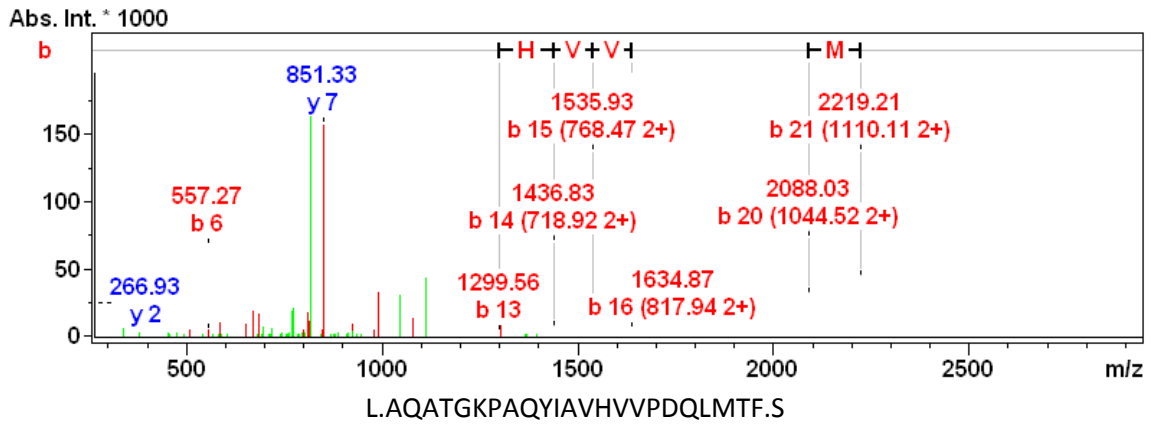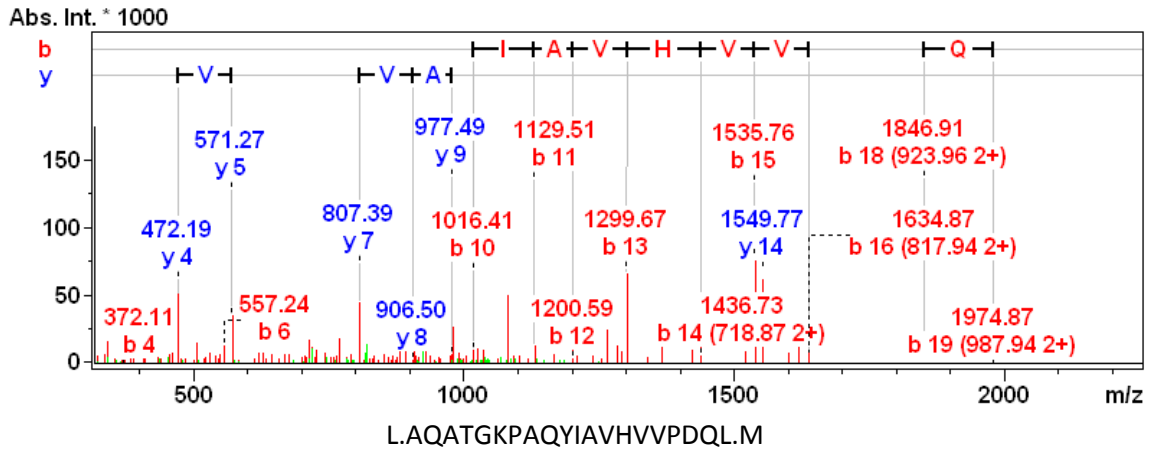

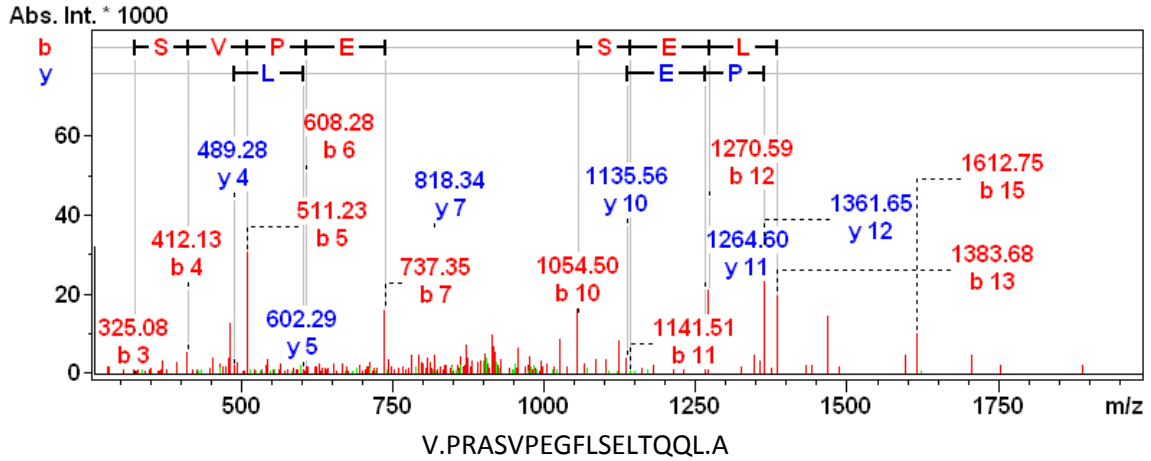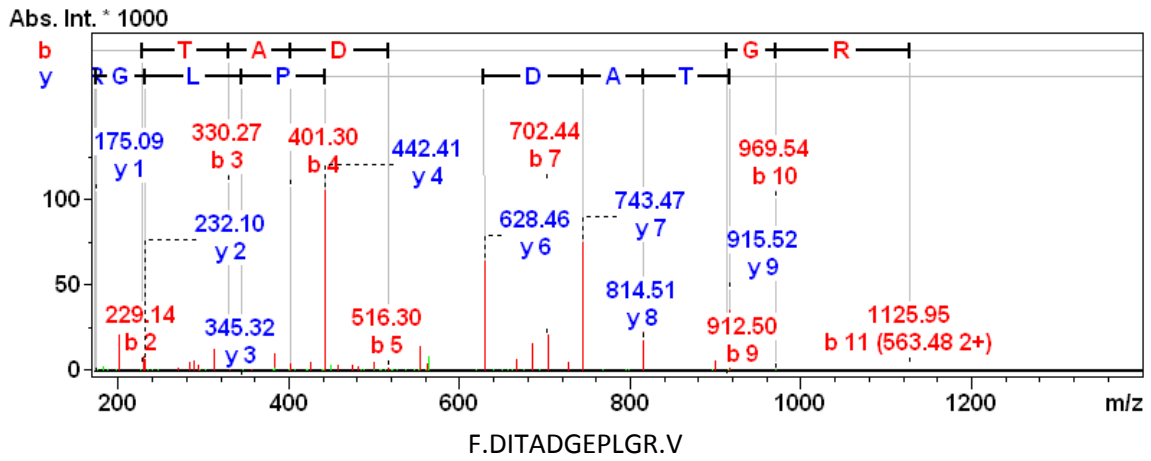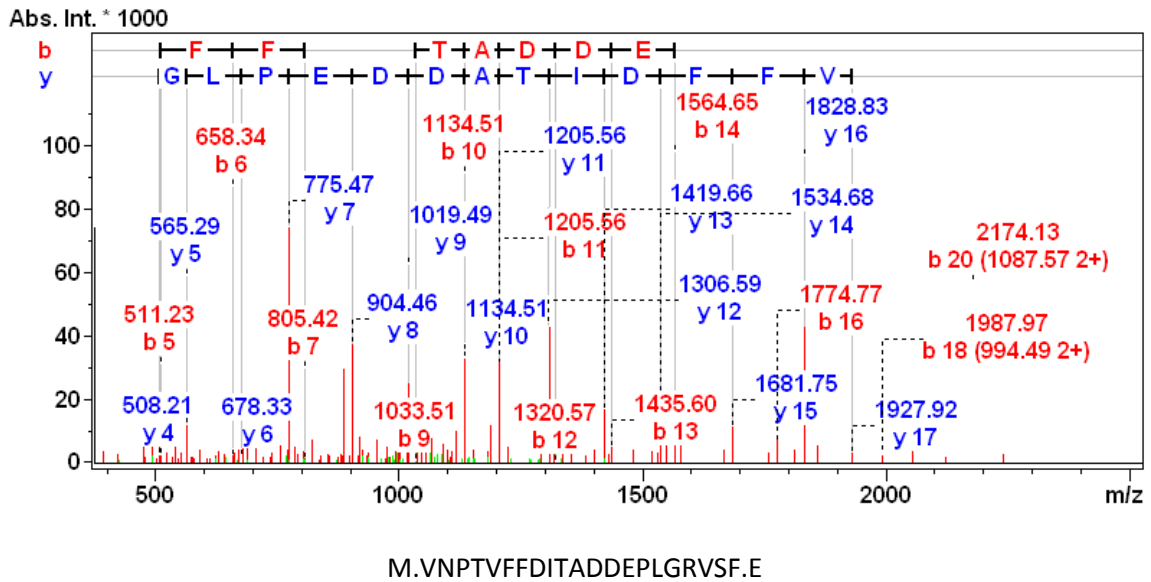

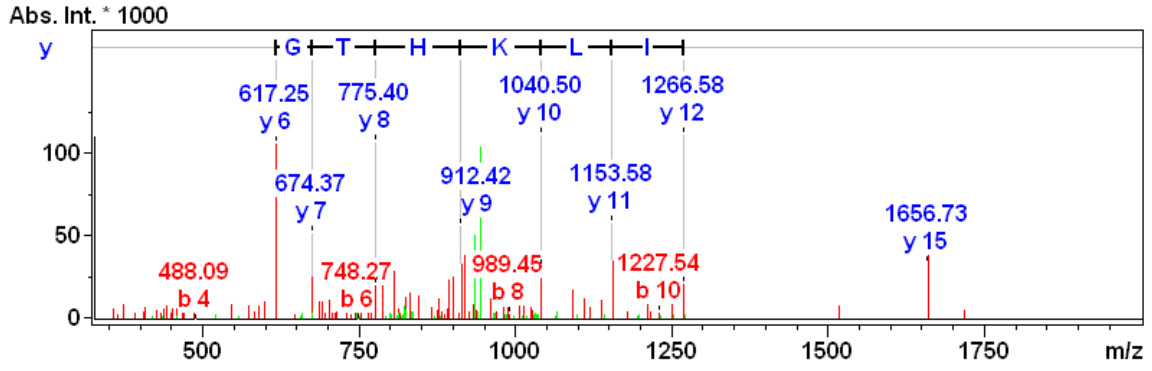

F.EDENFILKHTGPGILSM.A

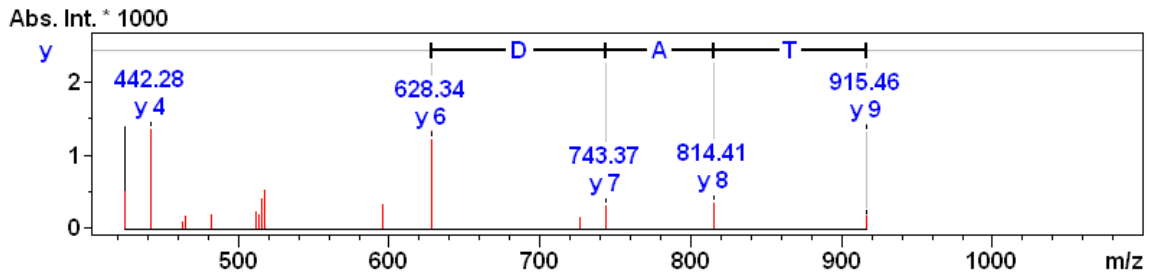

D.ITADGEPLGR.V

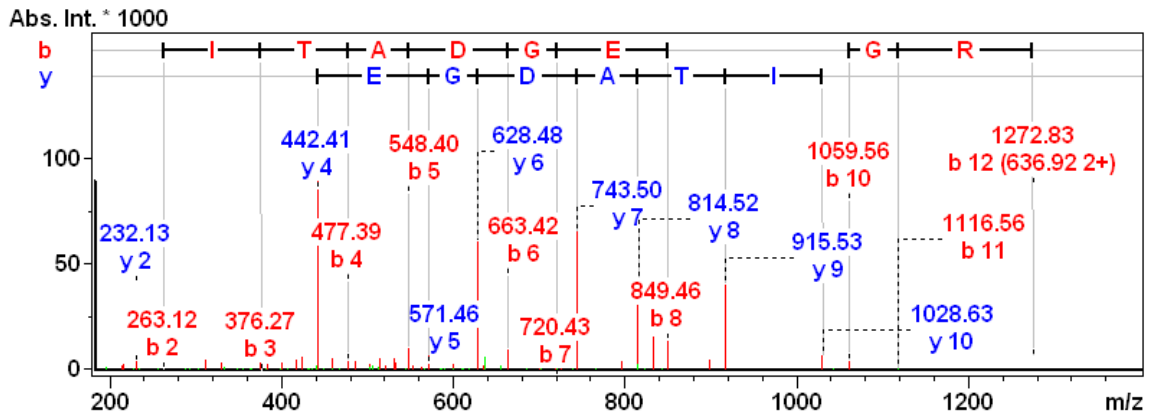

F.FDITADGEPLGR.V

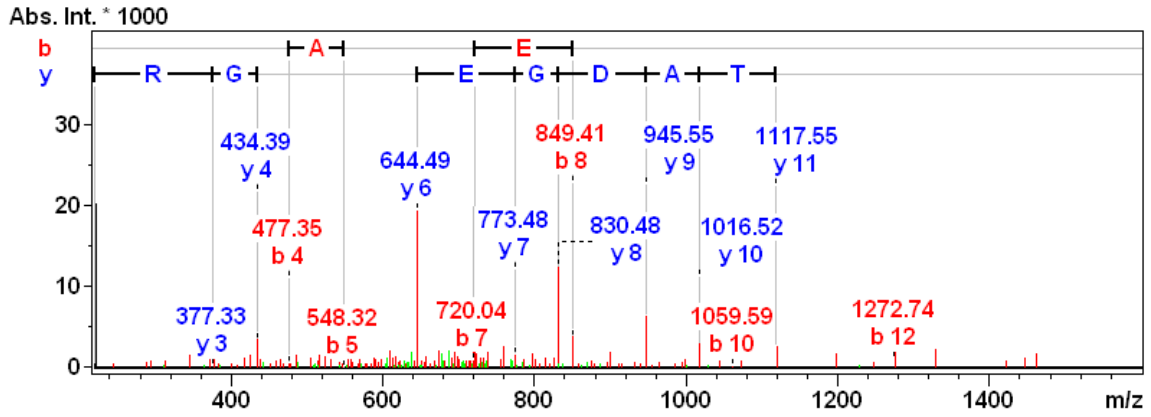

F.FDITADGEPLGRVC.F

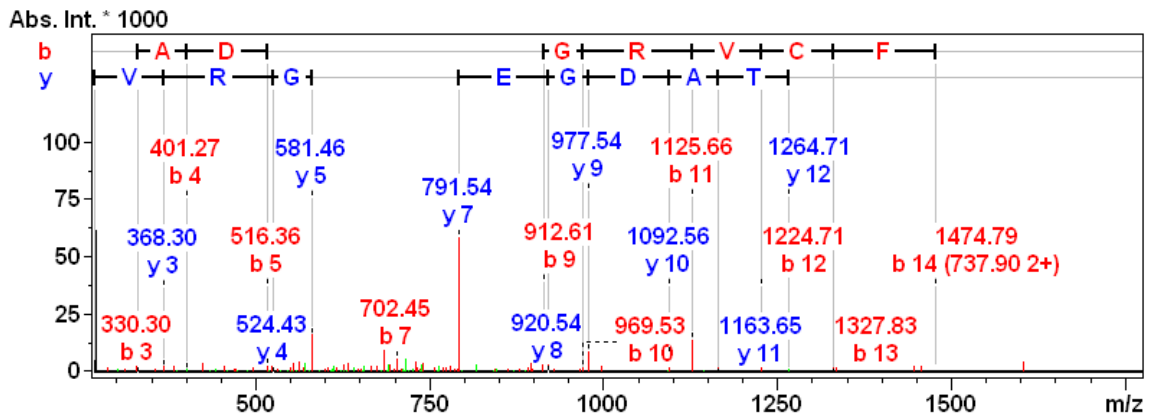

F.DITADGEPLGRVCF.E

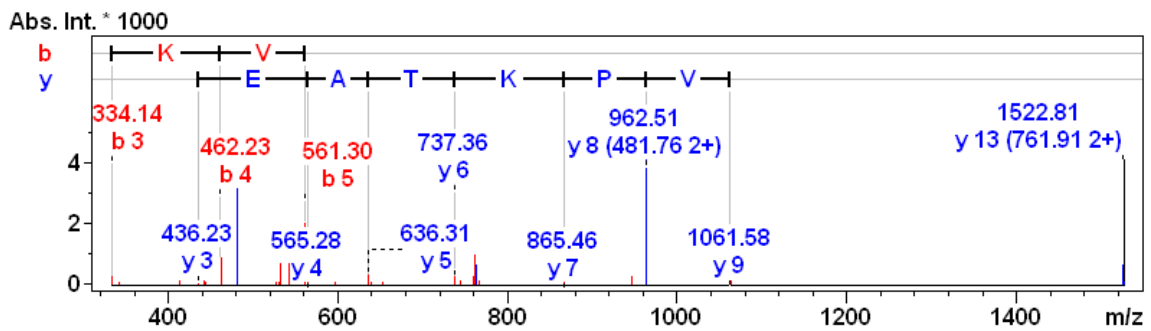

L.FADKVPKTAENFR.A

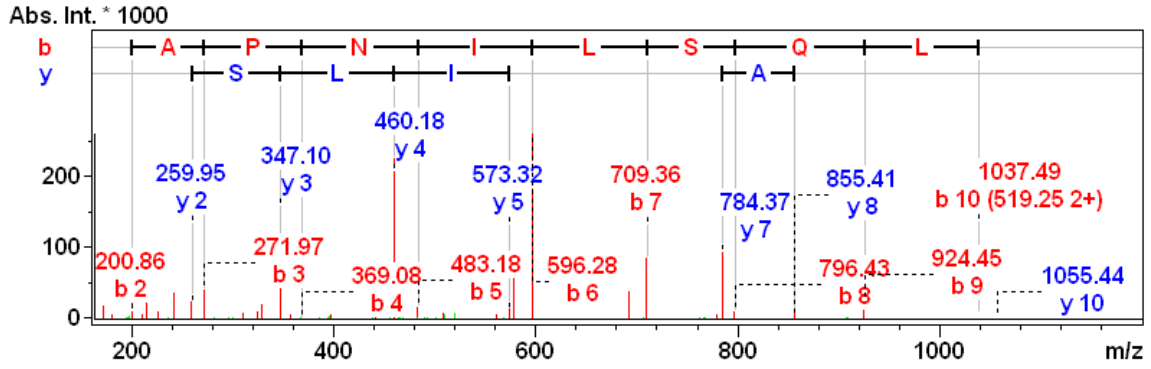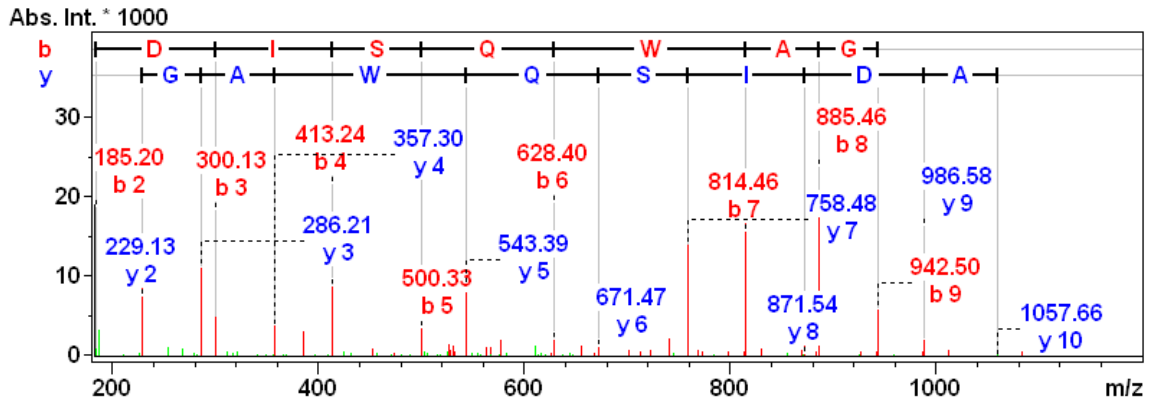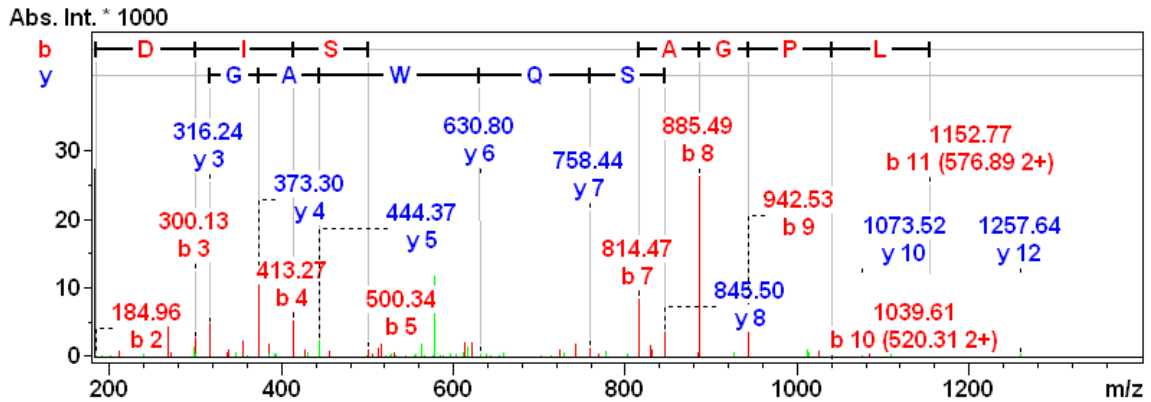



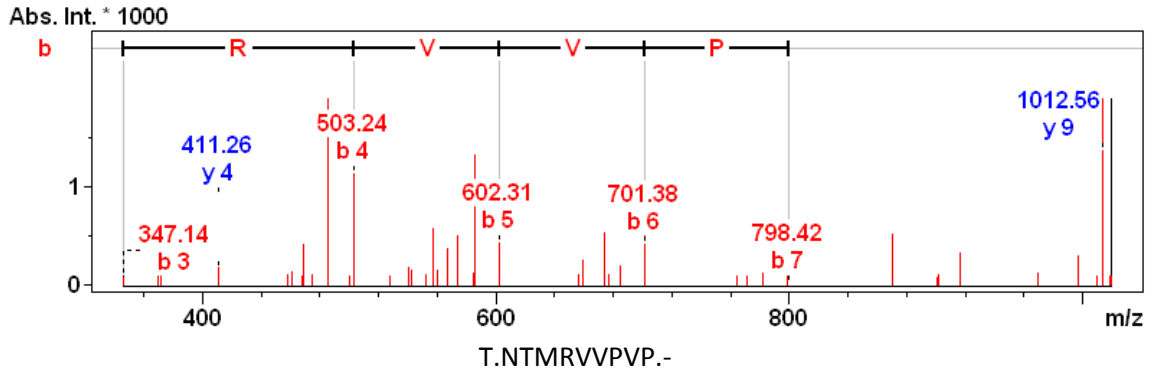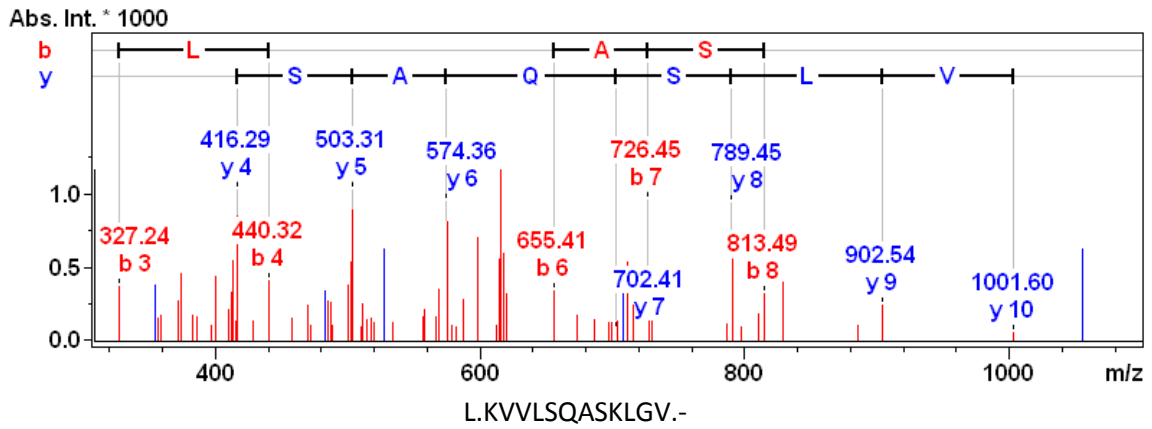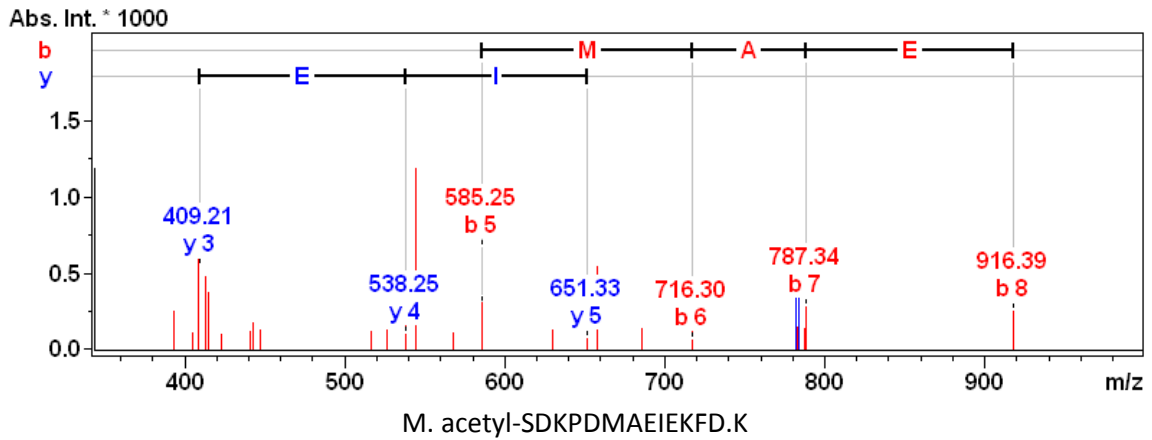

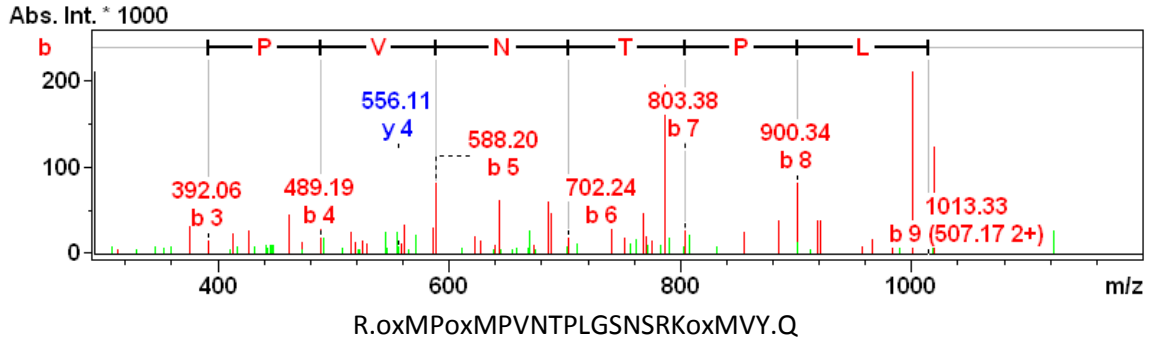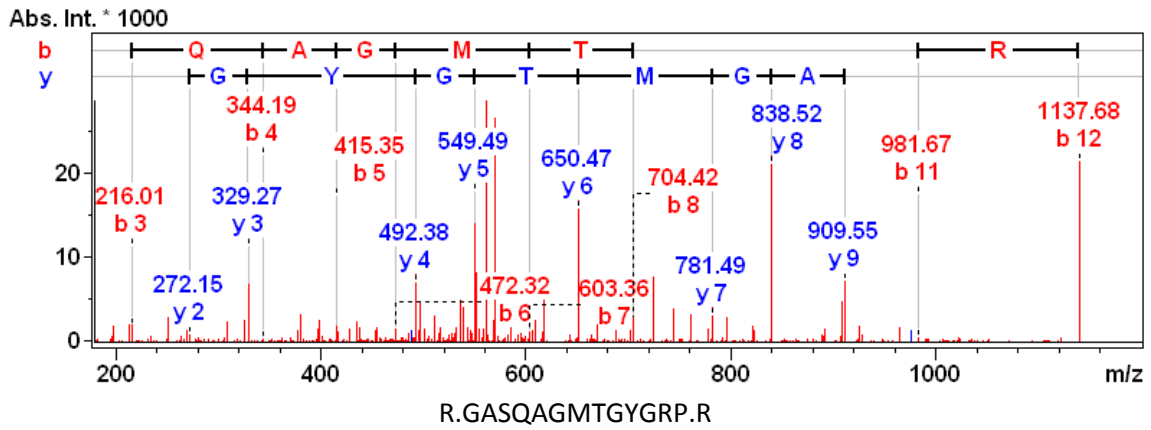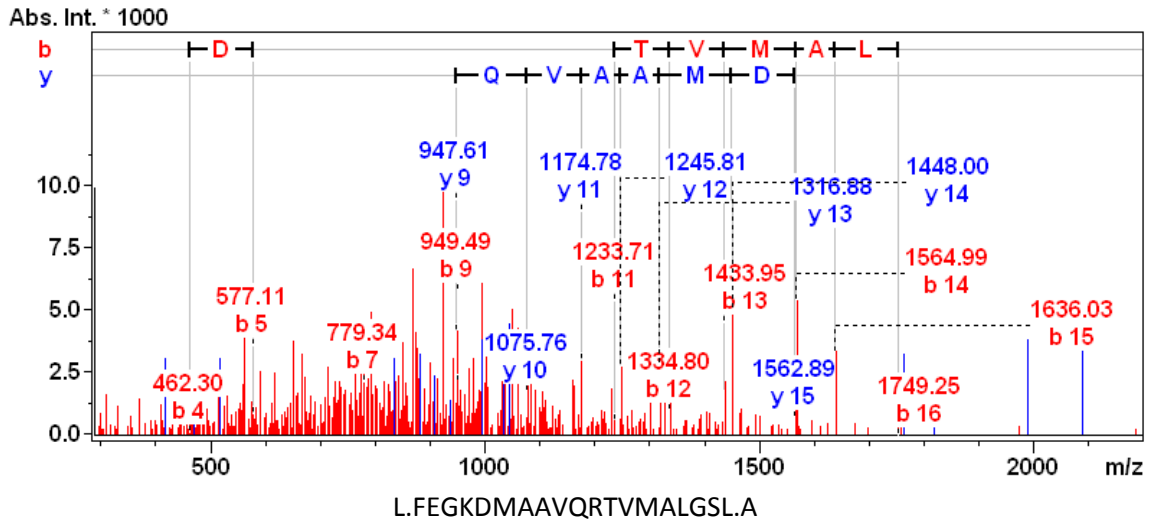

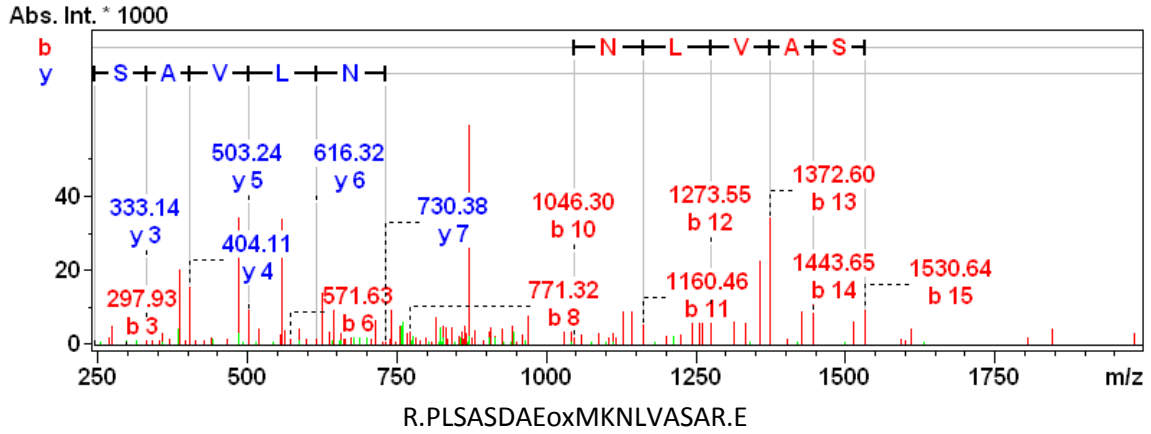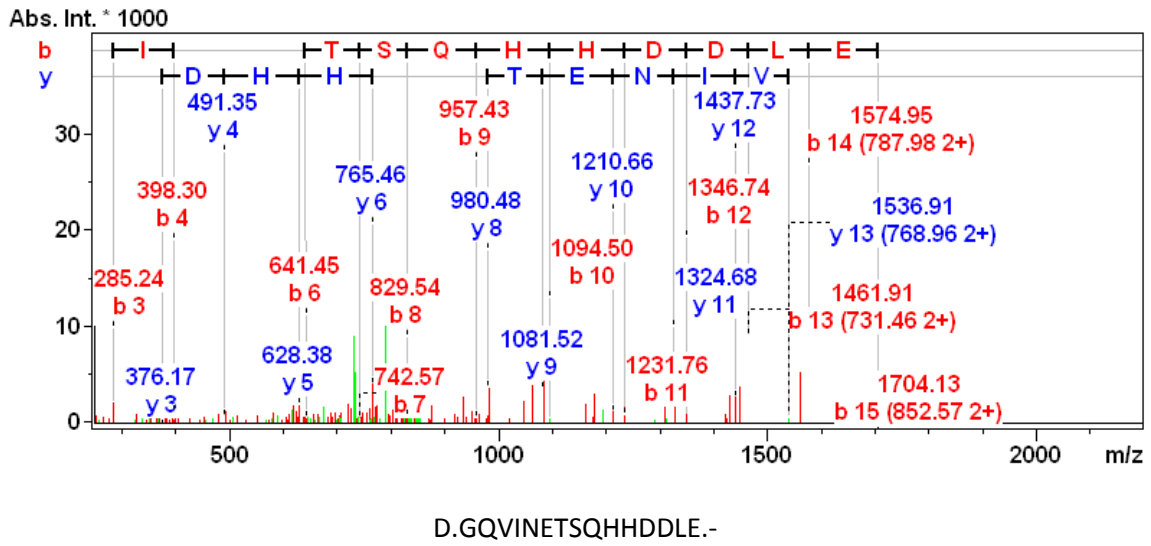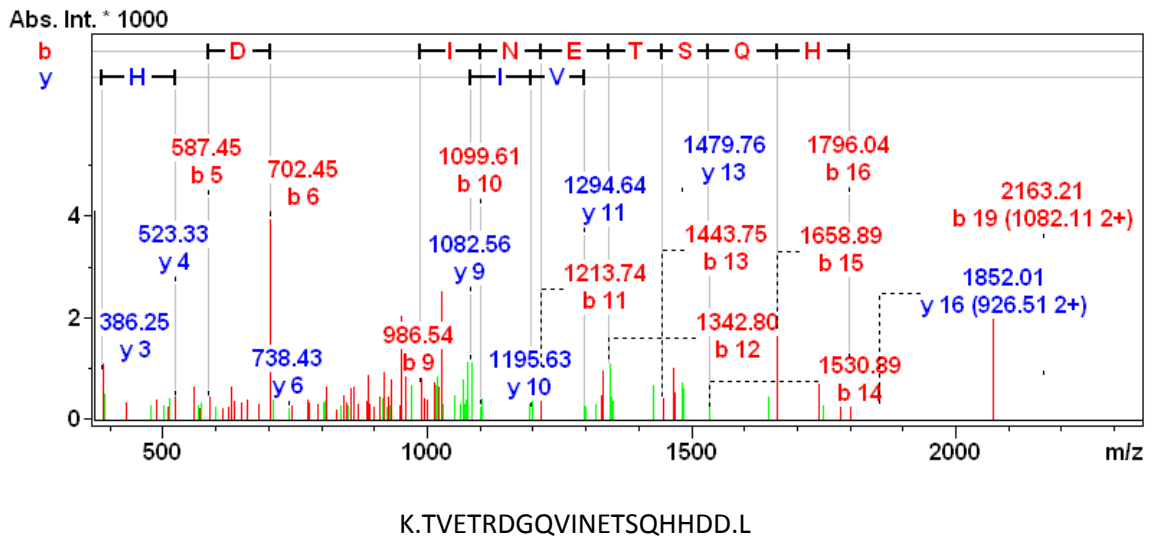

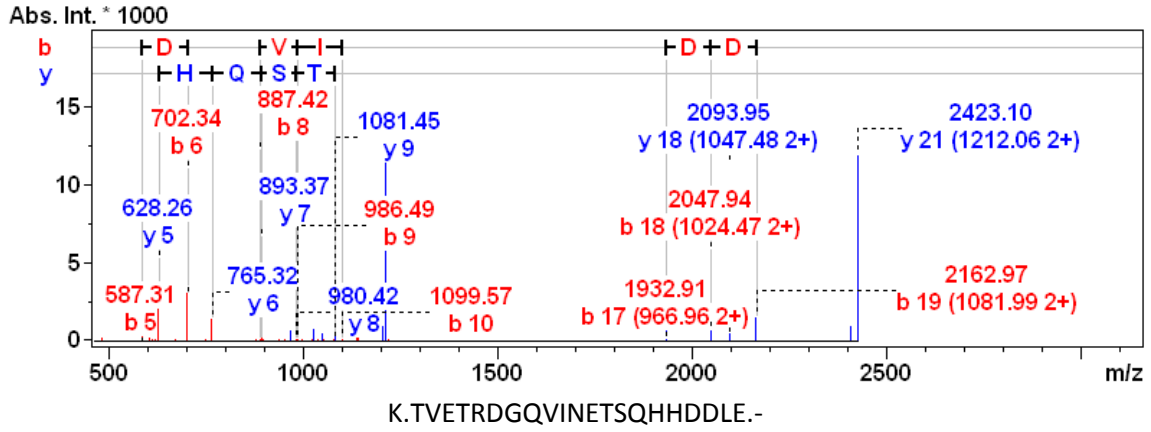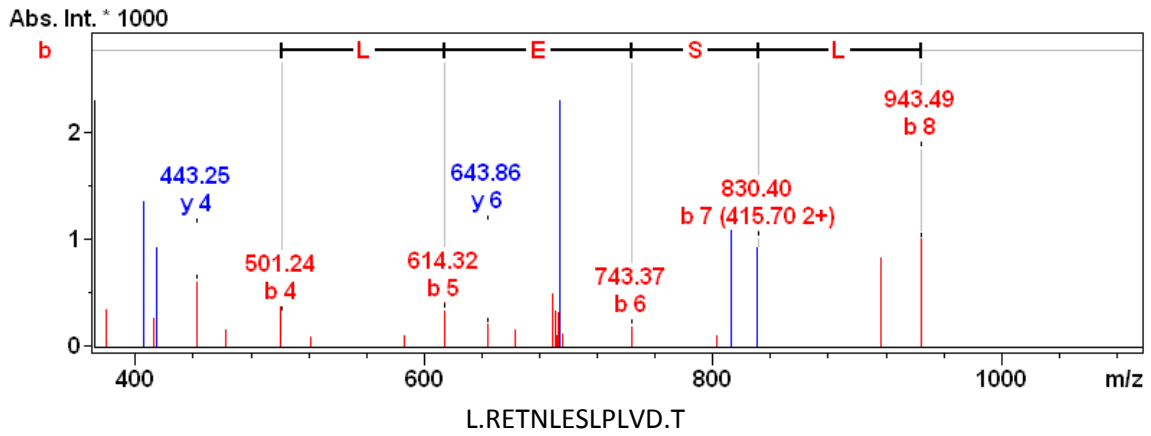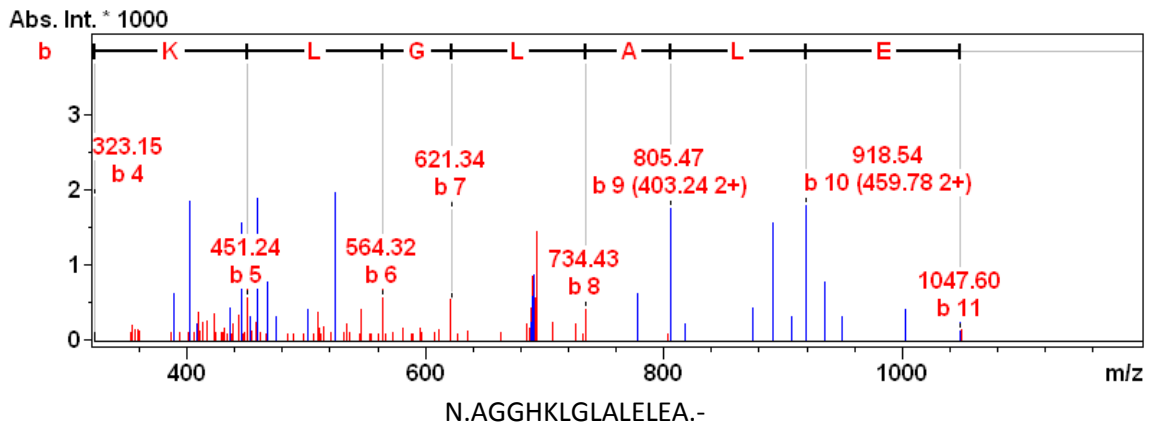

Supplement: NIHMS394211-supplement-1_si_001.pdf [file NIHMS394211-supplement-1_si_001.pdf]
